# Supplementary material for: Effects of Acute Dengue Infection on Sperm and Virus Clearance in Body Fluids of Men
Source: PubMed Central journal article supplement (PMC9155864; doi:10.3201/eid2806.212317), 2022-06
Supplement: 21-2317-Techapp-s1.pdf [file 21-2317-Techapp-s1.pdf]

# Effects of Acute Dengue Infection on Sperm and Virus Clearance in Body Fluids of Men

## Appendix

### Methods

#### Semen analyses

Semen analysis was performed according to WHO guidelines (1) on an aliquot (200  $\mu$ L) of semen. The parameters considered were sexual abstinence (days), ejaculate volume (mL), pH, sperm concentration (SC,  $10^6$  spermatozoa/mL), spermatozoa vitality (V, %) forward motility (M, a+b: %), total sperm count (volume  $\times$  SC = TSC,  $10^6$  spermatozoa/ejaculate) and total motile sperm count (TMSC = TSC  $\times$  M,  $10^6$ /ejaculate). Sperm cell morphology was assessed according to Auger's modification of the classification of David and colleagues (1). All semen analyses were performed by three trained technicians and underwent external quality control.

#### Sperm processing to isolate spermatozoa fractions

At days 7 and 15, in order to isolate spermatozoa enriched fractions, whole semen was submitted to differential density gradient centrifugation over 40%, and 80% of PureSperm (JCD S.A., Lyon, France) according to a previously published method (2). The sperm pellet (80% PureSperm layer) was washed twice with FertiCult IVF medium (JCD S.A., Lyon, France). The 40% fraction contains mostly low motile, dead, or abnormal spermatozoa and seminal non-spermatozoa cells (NSCs).

As the sperm pellet from the 80% fraction could contain rare non-sperm cells, motile spermatozoa from this fraction were further separated by the swim-up method according to a previously published method (2). Briefly, the sperm pellet was overlaid with 1.1 mL medium and incubated at 37°C, 5% CO<sub>2</sub> for 60 min in a tube at an angle of 45 degrees to allow the motile spermatozoa to swim up. The swim-up fraction contains only viable motile spermatozoa.

The seminal plasma, the whole semen cells and the different fractions obtained after density gradient preparation and after the swim-up method were collected and stored at  $-80^{\circ}\text{C}$  until DENV isolation and genome analyses.

## References

1. World Health Organization. WHO laboratory manual for the examination and processing of human semen, 5th edition. Geneva: World Health Organization; 2010.
2. Bujan L, Daudin M, Matsuda T, Righi L, Thauvin L, Berges L, et al. Factors of intermittent HIV-1 excretion in semen and efficiency of sperm processing in obtaining spermatozoa without HIV-1 genomes. *AIDS*. 2004;18:757–66. [PubMed https://doi.org/10.1097/00002030-200403260-00006](https://doi.org/10.1097/00002030-200403260-00006)

**Appendix Table.** Ct values from reverse-transcription PCR assays to detect dengue.\*

| Patient | Sampling time post clinical onset | DENV RNA detection, Ct |       |                     |                |
|---------|-----------------------------------|------------------------|-------|---------------------|----------------|
|         |                                   | Whole Blood            | Urine | Seminal cell pellet | Seminal plasma |
| 1       | D7                                | 38.8                   | 32.7  | –                   | –              |
|         | D15                               | 41.9                   | –     | –                   | –              |
|         | D30                               | –                      | –     | –                   | –              |
|         | D60                               | –                      | –     | –                   | –              |
|         | D90                               | –                      | –     | –                   | –              |
| 2       | D7                                | 36.8                   | 38.3  | –                   | –              |
|         | D15                               | 38.8                   | 37.8  | –                   | –              |
|         | D30                               | –                      | –     | –                   | –              |
|         | D60                               | –                      | –     | –                   | –              |
|         | D90                               | –                      | –     | –                   | –              |
| 3       | D7                                | 27.9                   | 33.8  | 35.9                | 36.7           |
|         | D15                               | 34.4                   | 36.8  | –                   | 40.7           |
|         | D30                               | 36.1                   | 38.0  | 35.0                | 39.1           |
|         | D60                               | 36.7                   | –     | –                   | –              |
|         | D90                               | –                      | –     | –                   | –              |
| 4       | D7                                | 37.6                   | –     | –                   | 38.3           |
|         | D15                               | 40.0                   | –     | 39.0                | 38.7           |
|         | D30                               | 41.0                   | –     | –                   | –              |
|         | D60                               | –                      | –     | –                   | –              |
|         | D90                               | –                      | –     | –                   | –              |
| 5       | D7                                | 42.9                   | –     | –                   | –              |
|         | D15                               | 34.9                   | –     | –                   | –              |
|         | D30                               | 36.6                   | –     | –                   | –              |
|         | D60                               | 37.1                   | –     | –                   | –              |
|         | D90                               | 41.2                   | –     | –                   | –              |
| 6       | D7                                | 34.4                   | 38.6  | –                   | 41.5           |
| 7       | D7                                | –                      | –     | –                   | –              |
|         | D15                               | –                      | –     | –                   | –              |
|         | D30                               | –                      | –     | –                   | –              |
|         | D60                               | –                      | –     | –                   | –              |
|         | D90                               | –                      | –     | –                   | –              |
| 8       | D7                                | 35.5                   | –     | –                   | –              |
|         | D15                               | 39.4                   | –     | –                   | –              |
|         | D30                               | –                      | –     | –                   | –              |
|         | D60                               | –                      | –     | –                   | –              |
|         | D90                               | –                      | –     | –                   | –              |

| Patient | Sampling time post clinical onset | DENV RNA detection, Ct |       |                     |                |
|---------|-----------------------------------|------------------------|-------|---------------------|----------------|
|         |                                   | Whole Blood            | Urine | Seminal cell pellet | Seminal plasma |
| 9       | D7                                | 37.7                   | -     | -                   | -              |
|         | D15                               | 41.1                   | -     | -                   | -              |
|         | D30                               | -                      | -     | -                   | -              |
|         | D60                               | -                      | -     | -                   | -              |
|         | D90                               | -                      | -     | -                   | -              |
| 10      | D7                                | 35.7                   | -     | -                   | 42.9           |
|         | D15                               | 36.2                   | -     | -                   | -              |
|         | D30                               | 38.1                   | -     | -                   | -              |
|         | D60                               | 39.6                   | -     | -                   | -              |
|         | D90                               | -                      | -     | -                   | -              |

\*D, days after symptom onset.

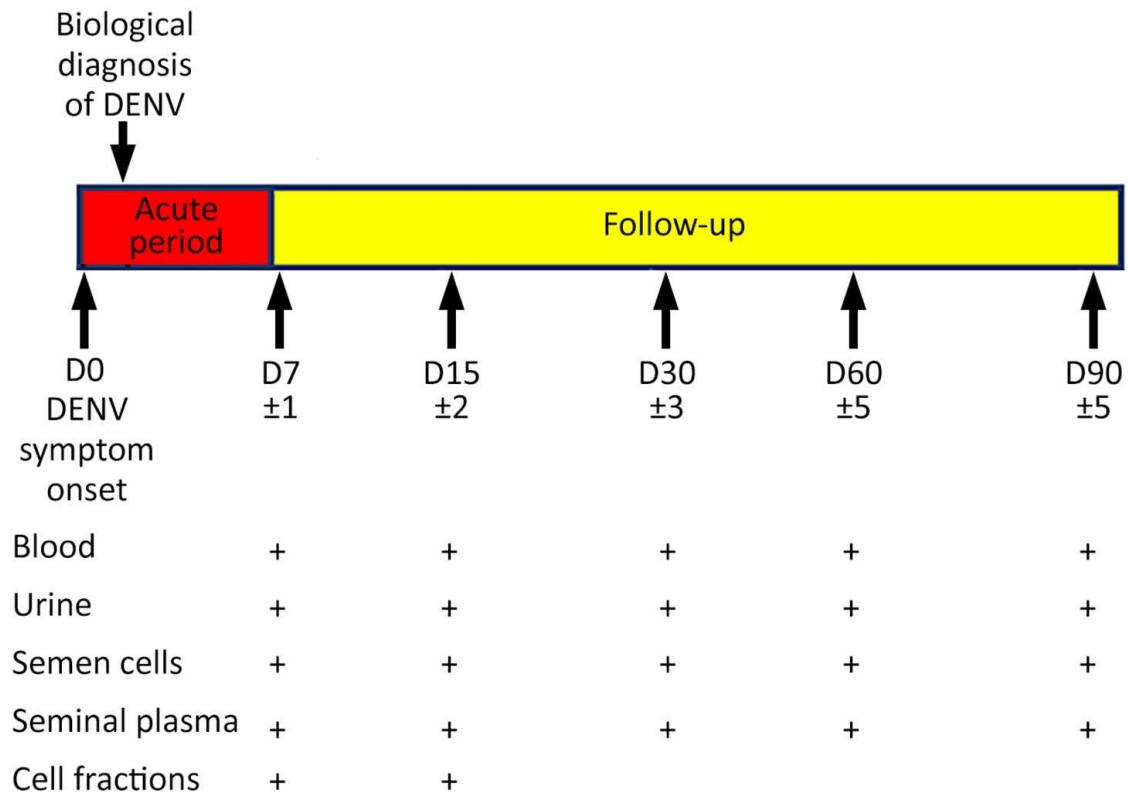

**Appendix Figure.** Schematic representation of the different sampling times during the follow-up of patients. DO: day of symptom onset following by DENV diagnosis that allows inclusion in the study.
